# Supplementary material for: PBM Competition in Pharmaceutical Supply Chain: Formulary Design and Drug Pricing
Source: Atypon-hosted journal article supplement (doi:10.1287/msom.2015.0542), 2015-08-03
Supplement: msom.2015.0542-sm-ecompanion.pdf [file msom.2015.0542-sm-ecompanion.pdf]

# Online Supplement to “PBM Competition in Pharmaceutical Supply Chain: Formulary Design and Drug Pricing”

## Appendix A: Proofs

*Proof of Theorem 1 (a).* By (5) and (6), we have

$$\max_{\vec{y}_j \in \{0,1\}^N, \vec{p}_j \in \mathbf{R}^{N+1}} \pi_j = \frac{\exp((A_j + CS_j - B_j)/\nu)}{\exp(u_e^0/\nu) + \sum_{k=1}^M \exp((A_k + CS_k - B_k)/\nu)} (B_j - W_j),$$

where  $W_j$  is given in (9). Using (7) and (8), we can rewrite PBM  $j$ 's problem as

$$\max_{\vec{y}_j \in \{0,1\}^N, \vec{p}_j \in \mathbf{R}^{N+1}} \pi_j = \frac{\exp((A_j - V_j)/\nu)}{\exp(u_e^0/\nu) + \sum_{k=1}^M \exp((A_k - V_k)/\nu)} (V_j - U_j).$$

Note that  $U_j$  only depends on the formulary decision  $\vec{y}_j \in \{0,1\}^N$ . Hence, the feasible set of  $U_j$  is given by  $\Omega_j$ , and (10) follows directly.

(b). It directly follows from (10) that  $\pi_j$  linearly decreases in  $U_j$ . Note that

$$\frac{\partial \ln \pi_j}{\partial V_j} = -\frac{1}{\nu} + \frac{1}{V_j - U_j} + \frac{\exp((A_j - V_j)/\nu)}{\nu (\exp(u_e^0/\nu) + \sum_{k=1}^M \exp((A_k - V_k)/\nu))}, \quad (25)$$

$$\text{and } \frac{\partial^2 \ln \pi_j}{\partial V_j^2} = -\frac{1}{(V_j - U_j)^2} - \frac{\exp((A_j - V_j)/\nu) (\exp(u_e^0/\nu) + \sum_{k \neq j} \exp((A_k - V_k)/\nu))}{\nu^2 (\exp(u_e^0/\nu) + \sum_{k=1}^M \exp((A_k - V_k)/\nu))^2} < 0, \quad (26)$$

showing that  $\pi_j$  is strictly log-concave in  $V_j$ . Further note that

$$V_j = \left( d_{0j}(\vec{y}_j)(p_{0j} - c_j^g) + \sum_{i=1}^N d_{ij}(\vec{y}_j)(p_{ij} - c_{ij}(y_{ij}) - \rho_j r_{ij} y_{ij}) \right) S - \frac{\mu}{\alpha} \left( \ln \left( \exp \left( \frac{\gamma_0 - \alpha c_j^g + \beta q_0}{\mu} \right) + \sum_{i=1}^N \exp \left( \frac{\gamma_i - \alpha c_{ij}(y_{ij}) + \beta q_i}{\mu} \right) \right) \right) S. \quad (27)$$

For any given original formulary decision vector  $\vec{y}_j \in \{0,1\}^N$  (and hence  $U_j$ ),  $V_j$  is a linear combination of the  $N+1$  original price decision variables  $p_{ij} \in \mathbf{R}$  ( $i=0, \dots, N$ ), as shown by (27). Therefore,  $V_j$  can target any value by varying the original price decision vector  $\vec{p}_j$ . Conversely, for any given  $V_j \in \mathbf{R}$ ,  $U_j$  can target any value in its feasible set  $\Omega_j$  by choosing the corresponding original formulary decision vector  $\vec{y}_j$ . At the chosen  $\vec{y}_j$ , we can keep  $V_j$  fixed at the given value by varying the original price decision vector  $\vec{p}_j$ .

(c). Based on the proof of parts (a) and (b), PBM  $j$  can determine its best response sequentially by solving the optimal  $U_j$  first and then the optimal  $V_j$ . For PBM  $j$ , the minimization of  $U_j$  is a combinatorial optimization on a finite set:  $\min_{\vec{y}_j \in \{0,1\}^N} U_j(\vec{y}_j)$ , and thus the optimal  $U_j^*$  is unique. Since each PBM's optimal aggregate formulary decision  $U_j^*$  is independent of each other, PBMs' competition on  $(U_j, V_j)$  can be reduced to a competition on  $V_j$  only. With  $U_j^*$  determined, PBM  $j$  only needs to consider the value of  $V_j$  in a compact and convex set,  $[U_j^*, \bar{V}_j]$ , where  $\bar{V}_j$  is the unique root of  $-\frac{1}{\nu} + \frac{1}{V_j - U_j^*} + \frac{\exp((A_j - V_j)/\nu)}{\nu (\exp(u_e^0/\nu) + \exp((A_j - V_j)/\nu))} = 0$ , because PBM  $j$  would make negative profit for any  $V_j < U_j^*$  and  $\partial \ln \pi_j / \partial V_j < 0$  for any  $V_j > \bar{V}_j$ . The existence of equilibrium directly follows from the concavity of  $\ln \pi_j$  in  $V_j$ . Furthermore,

$$\frac{\partial^2 \ln \pi_j}{\partial V_j^2} + \sum_{k \neq j} \left| \frac{\partial^2 \ln \pi_j}{\partial V_j \partial V_k} \right| = -\frac{1}{(V_j - U_j)^2} - \frac{\exp((A_j - V_j)/\nu) \exp(u_e^0/\nu)}{\nu^2 (\exp(u_e^0/\nu) + \sum_{k=1}^M \exp((A_k - V_k)/\nu))^2} < 0. \quad (28)$$

By Milgrom and Roberts (1990), a unique equilibrium is guaranteed, and satisfies the first order condition given by (25).

*Proof of Proposition 1* Substituting (9) and (2) into (8), we can write PBM  $j$ 's formulary problem as

$$\min_{\vec{y}_j \in \{0,1\}^N} U_j(\vec{y}_j) = \left( d_{0|j}(\vec{y}_j)(w_{0j} - c_j^g) + \sum_{i=1}^N d_{i|j}(\vec{y}_j)(w_{ij} - c_j^n + (c_j^n - c_j^p - r_{ij}) y_{ij}) \right) S - \frac{\mu}{\alpha} \left( \ln \left( \exp \left( \frac{\gamma_0 - \alpha c_j^g + \beta q_0}{\mu} \right) + \sum_{i=1}^N \exp \left( \frac{\gamma_i - \alpha c_j^n + \alpha(c_j^n - c_j^p) y_{ij} + \beta q_i}{\mu} \right) \right) \right) S. \quad (29)$$

By (11), we rewrite (29) into the following form:

$$\min_{\vec{y}_j \in \{0,1\}^N} U_j(\vec{y}_j) = \left( \frac{x_{0j} m_{0j} + \sum_{i=1}^N x_{ij} (y_{ij}) m_{ij} (y_{ij})}{x_{0j} + \sum_{i=1}^N x_{ij} (y_{ij})} - \frac{\mu}{\alpha} \ln \left( x_{0j} + \sum_{i=1}^N x_{ij} (y_{ij}) \right) \right) S. \quad (30)$$

First, we introduce the following lemma to characterize properties of PBMs' optimal formulary decision.

LEMMA 2. For  $j = 1, \dots, M$ , PBM  $j$  puts branded drug  $i$  on tier 2 (i.e.,  $y_{ij}^* = 1$ ) if for any  $\vec{y}_j \in \{0,1\}^N$ ,

$$\delta_{ij} \leq \frac{x_{0j} m_{0j} + \sum_{k=1}^N x_{kj} (y_{kj}) m_{kj} (y_{kj})}{x_{0j} + \sum_{k=1}^N x_{kj} (y_{kj})}. \quad (31)$$

*Proof of Lemma 2* We prove by contradiction. Let  $\vec{y}_j^*$  be PBM  $j$ 's optimal formulary decision vector. Assume to the contrary that (31) holds for any  $\vec{y}_j \in \{0,1\}^N$  and  $y_{ij}^* = 0$ . We can construct another formulary decision  $\vec{y}_j'$  by setting  $y'_{ij} = 1$  and  $y'_{kj} = y_{kj}^*$  for  $k \neq i$ . Then we have:

$$U_j(\vec{y}_j') = \left( \frac{x_{0j} m_{0j} + \sum_{k=1}^N x_{kj} (y_{kj}^*) m_{kj} (y_{kj}^*) + x_{ij} (1) m_{ij} (1) - x_{ij} (0) m_{ij} (0)}{x_{0j} + \sum_{k=1}^N x_{kj} (y_{kj}^*) + x_{ij} (1) - x_{ij} (0)} - \frac{\mu}{\alpha} \ln \left( x_{0j} + \sum_{k=1}^N x_{kj} (y_{kj}^*) + x_{ij} (1) - x_{ij} (0) \right) \right) S. \quad (32)$$

Since  $\delta_{ij} = \frac{x_{ij} (1) m_{ij} (1) - x_{ij} (0) m_{ij} (0)}{x_{ij} (1) - x_{ij} (0)} \leq \frac{x_{0j} m_{0j} + \sum_{k=1}^N x_{kj} (y_{kj}^*) m_{kj} (y_{kj}^*)}{x_{0j} + \sum_{k=1}^N x_{kj} (y_{kj}^*)}$  and  $x_{ij} (1) > x_{ij} (0)$ , we have  $U_j(\vec{y}_j') < U_j(\vec{y}_j^*)$ , contradicting the optimality of  $\vec{y}_j^*$ . This completes the proof.

Lemma 2 shows that when assigning branded drugs to tier 2, it is optimal for PBM  $j$  to start by choosing the branded drug with the smallest cost change rate, then add the drug with the second smallest cost change rate to tier 2, and so on, until (31) no longer holds. Since PBM  $j$  sorts branded drugs by their cost change rates in an ascending order, we can find the threshold index as follows:

```

Initialize  $I_j = 0$ ;
FOR  $i = 1, \dots, N$ 
  IF  $\delta_{ij} \leq \frac{x_{0j} m_{0j} + \sum_{k=1}^{i-1} x_{kj} (1) m_{kj} (1) + \sum_{k=i}^N x_{kj} (0) m_{kj} (0)}{x_{0j} + \sum_{k=1}^{i-1} x_{kj} (1) + \sum_{k=i}^N x_{kj} (0)}$ ,
     $I_j = i$ ;
  ELSE STOP;
ENDIF
ENDFOR

```

Note that

$$\min_{\vec{y}_j \in \{0,1\}^N} \frac{x_{0j} m_{0j} + \sum_{k=1}^N x_{kj} (y_{kj}) m_{kj} (y_{kj})}{x_{0j} + \sum_{k=1}^N x_{kj} (y_{kj})} = \frac{x_{0j} m_{0j} + \sum_{k=1}^{I_j} x_{kj} (1) m_{kj} (1) + \sum_{k=I_j+1}^N x_{kj} (0) m_{kj} (0)}{x_{0j} + \sum_{k=1}^{I_j} x_{kj} (1) + \sum_{k=I_j+1}^N x_{kj} (0)}.$$

By Lemma 2, if  $i \leq I_j$ , it is optimal for PBM  $j$  to assign drug  $i$  on tier 2 (i.e.,  $y_{ij}^* = 1$ ).

*Proof of Proposition 2* When all branded drugs on PBM  $j$ 's plan have the same brand-specific attribute  $\gamma_i$  and quality index  $q_i$ , we first show that if PBM  $j$  puts  $k$  branded drugs on tier 2, it is optimal for PBM  $j$  to assign  $k$  branded drugs with the smallest cost change rate indices on tier 2.

We prove the above statement by contradiction. Let  $\vec{y}_j^*$  be PBM  $j$ 's optimal formulary decision vector. Assume to the contrary of the statement, there exists an  $y_{ij}^* = 0$  ( $i \leq k$ ) and an  $y_{lj}^* = 1$  ( $l > k$ ). We can construct another formulary decision  $\vec{y}_j'$  by setting  $y'_{ij} = 1$  and  $y'_{lj} = 0$  while keeping other branded drugs' formulary decision unchanged. Then we have:

$$U_j(\vec{y}_j') = \left( \frac{x_{0j}m_{0j} + \sum_{k=1}^N x_{kj}(y_{kj}^*)m_{kj}(y_{kj}^*) + x_{ij}(1)m_{ij}(1) - x_{ij}(0)m_{ij}(0) - x_{lj}(1)m_{lj}(1) + x_{lj}(0)m_{lj}(0)}{x_{0j} + \sum_{k=1}^N x_{kj}(y_{kj}^*) + x_{ij}(1) - x_{ij}(0) - x_{lj}(1) + x_{lj}(0)} - \frac{\mu}{\alpha} \ln \left( x_{0j} + \sum_{k=1}^N x_{kj}(y_{kj}^*) + x_{ij}(1) - x_{ij}(0) - x_{lj}(1) + x_{lj}(0) \right) \right) S.$$

Note that all branded drugs have the same brand specific attribute and quality index, we have  $x_{ij}(1) - x_{ij}(0) = x_{lj}(1) - x_{lj}(0) > 0$ . Since PBM  $j$  ranks branded drugs in ascending order of their cost change rate, i.e.,  $\delta_{1j} \leq \delta_{2j} \leq \dots \leq \delta_{Nj}$ , we have  $\delta_{ij} = \frac{x_{ij}(1)m_{ij}(1) - x_{ij}(0)m_{ij}(0)}{x_{ij}(1) - x_{ij}(0)} \leq \delta_{lj} = \frac{x_{lj}(1)m_{lj}(1) - x_{lj}(0)m_{lj}(0)}{x_{lj}(1) - x_{lj}(0)}$ , and hence  $x_{ij}(1)m_{ij}(1) - x_{ij}(0)m_{ij}(0) \leq x_{lj}(1)m_{lj}(1) - x_{lj}(0)m_{lj}(0)$ . Therefore,  $U_j(\vec{y}_j') \leq U_j(\vec{y}_j^*)$ , contradicting the optimality of  $\vec{y}_j^*$ . This completes the proof of the statement.

By the above statement and Proposition 1, PBM  $j$  only needs to compare  $N - I_j + 1$  formulary decision vectors, each corresponding to putting  $k$  ( $k = I_j, \dots, N$ ) branded drugs with smallest cost change rate indices on tier 2. This completes the proof.

*Proof of Theorem 2* By the definition of  $V_j$  in (7) and the expression of  $n_j$  in (5), we can rewrite  $V_j$  as a function of PBMs' market share vector,  $\vec{n} = (n_1, \dots, n_M)$ , as follows:

$$V_j = A_j - u_e^0 - \nu \left( \ln n_j - \ln \left( 1 - \sum_{k=1}^M n_k \right) \right), \quad j = 1, \dots, M. \quad (33)$$

Let  $n_0$  denote the probability of the client not contracting with any PBM, we have  $n_0 = 1 - \sum_{k=1}^M n_k$ .

Given the optimal formulary decision, the equilibrium  $V_j^*$  satisfies the set of first order conditions given by (13). Substituting (33) into (13) and rearranging the terms, we have

$$n_j^* \cdot \exp\left(\frac{n_j^*}{1 - n_j^*}\right) = n_0^* \cdot \exp\left(\frac{A_j - U_j^* - u_e^0 - \nu}{\nu}\right), \quad j = 1, \dots, M. \quad (34)$$

By the definition of  $H(\cdot)$  function in (14), (16) directly follows. Combining with the fact that  $\sum_{j=0}^M n_j^* = 1$ , the equilibrium probability of not contracting with any PBM,  $n_0^*$ , satisfies the single-variable equation:

$$n_0 + \sum_{j=1}^M H\left(n_0 \cdot \exp\left(\frac{A_j - U_j^* - u_e^0 - \nu}{\nu}\right)\right) = 1.$$

Since  $H(\cdot)$  strictly increases from 0 to 1, the left-hand-side of the above equation strictly increases from 0 to a value greater than 1 as  $n_0$  increases from 0 to 1. Therefore,  $n_0^*$  is the unique solution to (15).

Substituting (5), (7) and (13) into (10), PBM  $j$ 's equilibrium expected profit is given by  $\pi_j^* = \frac{\nu n_j^*}{1 - n_j^*}$ .

Substituting  $n_0^* = 1 - \sum_{k=1}^M n_k^*$  into (33), (18) follows directly.

The client organization's expected utility in the equilibrium is given by

$$\begin{aligned}\bar{v}^* &= E \left( \max \left( \max_j v_j^*, v_0 \right) \right) = \nu \ln \left( \exp \left( \frac{u_e^0}{\nu} \right) + \sum_{j=1}^M \exp \left( \frac{A_j - V_j^*}{\nu} \right) \right) \\ &= \nu \ln \left( \exp \left( \frac{u_e^0}{\nu} \right) \left( 1 + \sum_{j=1}^M \frac{n_j^*}{n_0^*} \right) \right) = u_e^0 - \nu \ln n_0^*.\end{aligned}$$

*Proof of Lemma 1* (a). Applying the implicit function theorem on the function  $H(x)$ , we have

$$H'(x) = \frac{(1-H)^2}{(1-H+H^2)\exp\left(\frac{H}{1-H}\right)} > 0. \quad (35)$$

By (15), (34) and (35), and applying the implicit function theorem on (15), we have

$$\frac{\partial n_0^*}{\partial U_j^*} = \frac{\frac{(1-n_j^*)^2 n_j^*}{\nu(1-n_j^*+n_j^{*2})}}{1 + \sum_{k=1}^M \frac{(1-n_k^*)^2 n_k^*}{(1-n_k^*+n_k^{*2})n_0^*}} > 0. \quad (36)$$

(b). By (16) and (36), we have

$$\begin{aligned}\frac{\partial n_j^*}{\partial U_j^*} &= H' \left( n_0^* \cdot \exp \left( \frac{A_j - U_j^* - u_e^0 - \nu}{\nu} \right) \right) \cdot \exp \left( \frac{A_j - U_j^* - u_e^0 - \nu}{\nu} \right) \left( \frac{\partial n_0^*}{\partial U_j^*} - \frac{n_0^*}{\nu} \right) \\ &= -H' \left( n_0^* \cdot \exp \left( \frac{A_j - U_j^* - u_e^0 - \nu}{\nu} \right) \right) \cdot \exp \left( \frac{A_j - U_j^* - u_e^0 - \nu}{\nu} \right) \frac{n_0^* + \sum_{k \neq j} \frac{(1-n_k^*)^2 n_k^*}{1-n_k^*+n_k^{*2}}}{\nu \left( 1 + \sum_{k=1}^M \frac{(1-n_k^*)^2 n_k^*}{(1-n_k^*+n_k^{*2})n_0^*} \right)} < 0, \quad (37)\end{aligned}$$

$$\frac{\partial n_j^*}{\partial U_k^*} = H' \left( n_0^* \cdot \exp \left( \frac{A_j - U_j^* - u_e^0 - \nu}{\nu} \right) \right) \cdot \exp \left( \frac{A_j - U_j^* - u_e^0 - \nu}{\nu} \right) \frac{\partial n_0^*}{\partial U_k^*} > 0, \quad k \neq j. \quad (38)$$

By (17), (37) and (38),  $\frac{\partial \pi_j^*}{\partial U_j^*} < 0$  and  $\frac{\partial \pi_j^*}{\partial U_k^*} > 0$  ( $k \neq j$ ) directly follow.

(c). By (18), (36) and (37), we have

$$\frac{\partial V_j^*}{\partial U_j^*} = -\nu \left( \frac{1}{n_j^*} \frac{\partial n_j^*}{\partial U_j^*} - \frac{1}{n_0^*} \frac{\partial n_0^*}{\partial U_j^*} \right) > 0. \quad (39)$$

By (18), (34), (36) and (38), we have

$$\frac{\partial V_j^*}{\partial U_k^*} = -\nu \left( \frac{1}{n_j^*} \frac{\partial n_j^*}{\partial U_k^*} - \frac{1}{n_0^*} \frac{\partial n_0^*}{\partial U_k^*} \right) = \frac{\nu n_j^*}{(1-n_j^*+n_j^{*2})n_0^*} \frac{\partial n_0^*}{\partial U_k^*} > 0, \quad k \neq j. \quad (40)$$

(d). The result directly follows from (19) and part (c).

*Proof of Proposition 3* (a). Since formulary decision  $y_{ij}$  is a binary variable, showing that it is weakly decreasing is equivalent to showing that an increase from 0 to 1 cannot happen when the wholesale price of branded drug  $i$  increases. We prove by contradiction. Suppose that the wholesale price of branded drug  $i$  increases from  $w_{ij}$  to  $w'_{ij}$  ( $w'_{ij} > w_{ij}$ ),  $y_{ij}^*|_{w_{ij}} = 0$  and  $y_{ij}^*|_{w'_{ij}} = 1$ . Note that for any given  $\vec{y}_j$ , we have

$$\frac{\partial U_j(\vec{y}_j)}{\partial w_{ij}} = \frac{x_{ij}(y_{ij})S}{x_{0j} + \sum_{k=1}^N x_{kj}(y_{kj})} > 0, \quad \text{and} \quad \frac{\partial^2 U_j(\vec{y}_j)}{\partial w_{ij}^2} = 0. \quad (41)$$

Therefore,

$$U_j(\vec{y}_j^*|_{w_{ij}})|_{w_{ij}} \leq U_j(\vec{y}_j^*|_{w'_{ij}})|_{w_{ij}} < U_j(\vec{y}_j^*|_{w'_{ij}})|_{w'_{ij}} \leq U_j(\vec{y}_j^*|_{w_{ij}})|_{w'_{ij}},$$

which shows that

$$U_j(\vec{y}_j^*|_{w_{ij}})|_{w'_{ij}} - U_j(\vec{y}_j^*|_{w_{ij}})|_{w_{ij}} \geq U_j(\vec{y}_j^*|_{w'_{ij}})|_{w'_{ij}} - U_j(\vec{y}_j^*|_{w'_{ij}})|_{w_{ij}}. \quad (42)$$

By (41), we have

$$U_j(\vec{y}_j^*|w_{ij})|_{w'_{ij}} - U_j(\vec{y}_j^*|w_{ij})|_{w_{ij}} = \frac{x_{ij}(y_{ij}^*|w_{ij})(w'_{ij} - w_{ij})S}{x_{0j} + \sum_{k=1}^N x_{kj}(y_{kj}^*|w_{ij})}, \quad (43)$$

$$\text{and } U_j(\vec{y}_j^*|w'_{ij})|_{w'_{ij}} - U_j(\vec{y}_j^*|w'_{ij})|_{w_{ij}} = \frac{x_{ij}(y_{ij}^*|w'_{ij})(w'_{ij} - w_{ij})S}{x_{0j} + \sum_{k=1}^N x_{kj}(y_{kj}^*|w'_{ij})}. \quad (44)$$

Substitute  $y_{ij}^*|w_{ij} = 0$ ,  $y_{ij}^*|w'_{ij} = 1$ , (43) and (44) into (42), we have

$$x_{ij}(0) \left( x_{0j} + \sum_{k=1}^N x_{kj}(y_{kj}^*|w'_{ij}) \right) \geq x_{ij}(1) \left( x_{0j} + \sum_{k=1}^N x_{kj}(y_{kj}^*|w_{ij}) \right) \quad (45)$$

The left hand side of (45) satisfies

$$x_{ij}(0) \left( x_{0j} + \sum_{k=1}^N x_{kj}(y_{kj}^*|w'_{ij}) \right) \leq x_{ij}(0) \left( x_{0j} + \sum_{k=1}^N x_{kj}(1) \right) = x_{ij}(0)x_{0j} + \sum_{k=1}^N \exp\left(\frac{\gamma_i + \gamma_k + \beta(q_i + q_k) - \alpha(c_j^n + c_j^p)}{\mu}\right),$$

while the right hand side of (45) satisfies

$$x_{ij}(1) \left( x_{0j} + \sum_{k=1}^N x_{kj}(y_{kj}^*|w_{ij}) \right) \geq x_{ij}(1) \left( x_{0j} + \sum_{k=1}^N x_{kj}(0) \right) = x_{ij}(1)x_{0j} + \sum_{k=1}^N \exp\left(\frac{\gamma_i + \gamma_k + \beta(q_i + q_k) - \alpha(c_j^n + c_j^p)}{\mu}\right).$$

By (45) and  $x_{0j} > 0$ , we have  $x_{ij}(0) \geq x_{ij}(1)$ . This contradicts with the fact that  $x_{ij}(0) < x_{ij}(1)$ .

In general, the impact of any other drug's wholesale price on the focal drug's optimal formulary decision is non-monotone, and we have observed this non-monotone effect in numerical examples.

Recall that the optimal formulary decision vector is a dominant choice, and is independent of all other PBMs' decision and cost parameters. Therefore, PBM  $j$ 's optimal formulary decision is independent of any drug's wholesale price on any competing PBM's plan.

(b). Note that for any given  $\vec{y}_j$ , (41) holds for any  $i = 0, \dots, N$ . Consider the case that the wholesale price of any (branded or generic) drug  $i$  increases from  $w_{ij}$  to  $w'_{ij}$  ( $w'_{ij} > w_{ij}$ ). By (41),  $U_j^*|_{w'_{ij}} = U_j(\vec{y}_j^*|w'_{ij})|_{w'_{ij}} > U_j(\vec{y}_j^*|w'_{ij})|_{w_{ij}} \geq U_j(\vec{y}_j^*|w_{ij})|_{w_{ij}} = U_j^*|_{w_{ij}}$ . Therefore,  $U_j^*$  strictly increases in the wholesale price of any (branded or generic) drug charged to PBM  $j$ .

Since each PBM's formulary decision is independent of each other, the optimal welfare-adjusted cost of PBM  $j$ 's plan  $U_j^*$  is independent of any (branded or generic) drug's wholesale price charged to any competing PBM.

(c). Since each PBM's formulary decision is independent of each other, the optimal welfare-adjusted cost of PBM  $j$ 's plan  $U_j^*$  is independent of any (branded or generic) drug  $l$ 's wholesale price charged to PBM  $k$  ( $k \neq j$ ),  $w_{lk}$ . Therefore, the impact of  $w_{lk}$  on the equilibrium welfare-adjusted price of PBM  $j$ 's plan  $V_j^*$  is only through its impact on the optimal welfare-adjusted cost of PBM  $k$ 's plan  $U_k^*$ . By part (c) of Lemma 1 and part (b) of Proposition 3,  $V_j^*$  strictly increases in  $w_{lk}$  and  $w_{lj}$ .

(d). The impact of  $w_{lk}$  on the client's expected utility  $\bar{v}^*$  directly follows from (19) and part (c) of Proposition 3.

(e). We will show this part in an analogous approach as the above proof in part (c). Since the optimal welfare-adjusted cost of PBM  $j$ 's plan  $U_j^*$  is independent of any (branded or generic) drug  $l$ 's ( $l = 0, \dots, N$ )

wholesale price charged to any other PBM  $k$  ( $k \neq j$ ),  $w_{lk}$ . Therefore, the impact of  $w_{lk}$  on PBM  $j$ 's equilibrium expected market share  $n_j^*$  and expected profit  $\pi_j^*$  is only through its impact on the optimal welfare-adjusted cost of PBM  $k$ 's plan  $U_k^*$ . By part (b) of Lemma 1 and part (b) of Proposition 3, the statement follows directly.

*Proof of Proposition 4* (a). For any given  $\vec{y}_j$  and branded drug  $i$ ,

$$\frac{\partial U_j(\vec{y}_j)}{\partial q_i} = -\frac{\beta S x_{ij}(y_{ij})}{\mu(x_{0j} + \sum_{l=1}^N x_{lj}(y_{lj}))^2} \left( \frac{\mu}{\alpha} x_{ij}(y_{ij}) + x_{0j} \left( \frac{\mu}{\alpha} - m_{ij}(y_{ij}) + m_{0j} \right) + \sum_{l \neq i} x_{lj}(y_{lj}) \left( \frac{\mu}{\alpha} - m_{ij}(y_{ij}) + m_{lj}(y_{lj}) \right) \right). \quad (46)$$

Therefore,  $\text{sgn} \left( \frac{\partial U_j(\vec{y}_j)}{\partial q_i} \right) = -\text{sgn} \left( \frac{\mu}{\alpha} x_{ij}(y_{ij}) + x_{0j} \left( \frac{\mu}{\alpha} - m_{ij}(y_{ij}) + m_{0j} \right) + \sum_{l \neq i} x_{lj}(y_{lj}) \left( \frac{\mu}{\alpha} - m_{ij}(y_{ij}) + m_{lj}(y_{lj}) \right) \right)$ . Note that  $\frac{\mu}{\alpha} x_{ij}(y_{ij}) + x_{0j} \left( \frac{\mu}{\alpha} - m_{ij}(y_{ij}) + m_{0j} \right) + \sum_{l \neq i} x_{lj}(y_{lj}) \left( \frac{\mu}{\alpha} - m_{ij}(y_{ij}) + m_{lj}(y_{lj}) \right)$  is convex increasing in  $q_i$ , and approaches to  $+\infty$  when  $q_i \rightarrow +\infty$ . So  $\frac{\mu}{\alpha} x_{ij}(y_{ij}) + x_{0j} \left( \frac{\mu}{\alpha} - m_{ij}(y_{ij}) + m_{0j} \right) + \sum_{l \neq i} x_{lj}(y_{lj}) \left( \frac{\mu}{\alpha} - m_{ij}(y_{ij}) + m_{lj}(y_{lj}) \right)$  crosses 0 at most once. Denote  $q_{ij}(\vec{y}_j)$  as the unique root of  $\frac{\mu}{\alpha} x_{ij}(y_{ij}) + x_{0j} \left( \frac{\mu}{\alpha} - m_{ij}(y_{ij}) + m_{0j} \right) + \sum_{l \neq i} x_{lj}(y_{lj}) \left( \frac{\mu}{\alpha} - m_{ij}(y_{ij}) + m_{lj}(y_{lj}) \right) = 0$  when exists, and  $q_{ij}(\vec{y}_j) = -\infty$  otherwise. Set  $\bar{q}_{ij} = (\max_{\vec{y}_j \in \{0,1\}^N} q_{ij}(\vec{y}_j))^+$  and  $\underline{q}_{ij} = (\min_{\vec{y}_j \in \{0,1\}^N} q_{ij}(\vec{y}_j))^+$ . It directly follows that  $\frac{\mu}{\alpha} x_{ij}(y_{ij}) + x_{0j} \left( \frac{\mu}{\alpha} - m_{ij}(y_{ij}) + m_{0j} \right) + \sum_{l \neq i} x_{lj}(y_{lj}) \left( \frac{\mu}{\alpha} - m_{ij}(y_{ij}) + m_{lj}(y_{lj}) \right) > 0$  for any  $\vec{y}_j \in \{0,1\}^N$  when  $q_i > \bar{q}_{ij}$ , and  $\frac{\mu}{\alpha} x_{ij}(y_{ij}) + x_{0j} \left( \frac{\mu}{\alpha} - m_{ij}(y_{ij}) + m_{0j} \right) + \sum_{l \neq i} x_{lj}(y_{lj}) \left( \frac{\mu}{\alpha} - m_{ij}(y_{ij}) + m_{lj}(y_{lj}) \right) < 0$  for any  $\vec{y}_j \in \{0,1\}^N$  when  $0 \leq q_i < \underline{q}_{ij}$ . Therefore, PBM  $j$ 's optimal welfare-adjusted cost,  $U_j^*$ , strictly increases in branded drug  $i$ 's quality index,  $q_i$ , if  $0 \leq q_i < \underline{q}_{ij}$ , and strictly decreases in  $q_i$  if  $q_i > \bar{q}_{ij}$ .

When  $q_{ij}(\vec{y}_j) \neq -\infty$ , applying the implicit function theorem, we have  $q_{ij}(\vec{y}_j)$  increases in  $w_{ij}$  and weakly decreases  $r_{ij}$ . Therefore,  $\bar{q}_{ij} = (\max_{\vec{y}_j \in \{0,1\}^N} q_{ij}(\vec{y}_j))^+$  and  $\underline{q}_{ij} = (\min_{\vec{y}_j \in \{0,1\}^N} q_{ij}(\vec{y}_j))^+$  both weakly increase in  $w_{ij}$  and weakly decrease in  $r_{ij}$ .

The impact of generic drug's quality  $q_0$  can be shown in the same way.

(b). By Lemma 1, the impact of drug quality affects any PBM's equilibrium expected welfare-adjusted price, market share, profit, and the client's utility through its impact on all PBMs' optimal welfare-adjusted costs. When all PBMs are symmetric with respect to the cost parameters, the impact of any drug's quality on the optimal welfare-adjusted cost,  $U_j^*$ , is the same across all PBMs. Therefore, the impact of any drug's quality on all the quantities of interest mentioned above depends on the aggregate impact of the drug's quality on all PBMs' optimal welfare-adjusted costs. For PBM  $j$ , by (37) and (38), we have

$$\sum_{k=1}^M \frac{\partial n_j^*}{\partial U_k^*} = -H' \left( n_0^* \exp \left( \frac{A_j - U_j^* - u_e^0 - \nu}{\nu} \right) \right) \exp \left( \frac{A_j - U_j^* - u_e^0 - \nu}{\nu} \right) \frac{n_0^*}{\nu \left( 1 + \sum_{k=1}^M \frac{(1-n_k^*)^2 n_k^*}{(1-n_k^* + n_k^{*2}) n_0^*} \right)} < 0. \quad (47)$$

Therefore, the impact of  $q_i$  on  $n_j^*$  has the opposite directional change as the impact of  $q_i$  on  $U_j^*$ .

The impact of  $q_i$  on  $V_j^*$ ,  $\pi_j^*$ , and  $\bar{v}^*$  can be shown in the same way.

*Proof of Proposition 5* Substituting (16) into (15) and by the symmetry of PBMs in the pre-merger model, the equilibrium market share of PBM  $j$ ,  $n_j^*$ , is the unique solution on  $(0, 1)$  of the following equation:

$$n_j^* \left( M + \exp \left( \frac{n_j^*}{1-n_j^*} - \frac{A_j - U_j^* - u_e^0 - \nu}{\nu} \right) \right) = 1, \quad j = 1, \dots, M. \quad (48)$$

After the merger, it directly follows from (16) and the fact  $U_1^{m*} \leq U_1^* = U_j^{m*}$  ( $j = 3, \dots, M$ ) that  $n_1^{m*} \geq n_j^{m*}$  ( $j = 3, \dots, M$ ). All non-merging PBMs remain symmetric after the merger. By (17),  $\pi_1^{m*} \geq \pi_j^{m*}$  ( $j = 3, \dots, M$ ) always holds. Apply (15) and (16) to the post-merger model, we have the following relationships:

$$n_0^{m*} + n_1^{m*} + (M-2)n_j^{m*} = 1, \quad (49)$$

$$n_1^{m*} \exp\left(\frac{n_1^{m*}}{1-n_1^{m*}}\right) = n_0^{m*} \exp\left(\frac{A_1 - U_1^{m*} - u_e^0 - \nu}{\nu}\right), \quad (50)$$

$$n_j^{m*} \exp\left(\frac{n_j^{m*}}{1-n_j^{m*}}\right) = n_0^{m*} \exp\left(\frac{A_j - U_j^{m*} - u_e^0 - \nu}{\nu}\right), \quad j = 3, \dots, M. \quad (51)$$

Using  $A_1 = A_j$  and  $U_j^{m*} = U_j^* = U_1^*$  ( $j = 3, \dots, M$ ), we have  $n_j^{m*}$  satisfies the following equation:

$$n_j^{m*} \exp\left(\frac{n_j^{m*}}{1-n_j^{m*}} - \frac{A_j - U_j^* - u_e^0 - \nu}{\nu}\right) + H\left(n_j^{m*} \exp\left(\frac{n_j^{m*}}{1-n_j^{m*}} + \frac{\Delta U}{\nu}\right)\right) + (M-2)n_j^{m*} = 1, \quad j = 3, \dots, M. \quad (52)$$

Note that the left hand side of (52) strictly increases from 0 to a number greater than 1, as  $n_j^{m*}$  increases on  $[0, 1)$ , so  $n_j^{m*}$  is the unique solution of the above equation. Therefore,  $n_j^{m*} \geq n_j^*$  ( $j = 3, \dots, M$ ) iff

$$n_j^* \exp\left(\frac{n_j^*}{1-n_j^*} - \frac{A_j - U_j^* - u_e^0 - \nu}{\nu}\right) + H\left(n_j^* \exp\left(\frac{n_j^*}{1-n_j^*} + \frac{\Delta U}{\nu}\right)\right) + (M-2)n_j^* \leq 1, \quad (53)$$

where  $n_j^*$  is given by (48). (53) can be further reduced to  $\Delta U \leq \Delta \bar{U}$ , where

$$\Delta \bar{U} = \nu \left( \frac{2n_j^*}{1-2n_j^*} - \frac{n_j^*}{1-n_j^*} + \ln 2 \right). \quad (54)$$

By (17), it directly follows that  $\pi_j^{m*} \geq \pi_j^*$  ( $j = 3, \dots, M$ ) iff  $\Delta U \leq \Delta \bar{U}$ .

Similarly, by (49), (50) and (51), we have  $n_1^{m*}$  satisfies the following equation:

$$n_1^{m*} \exp\left(\frac{n_1^{m*}}{1-n_1^{m*}} - \frac{\Delta U + A_j - U_j^* - u_e^0 - \nu}{\nu}\right) + n_1^{m*} + (M-2)H\left(n_1^{m*} \exp\left(\frac{n_1^{m*}}{1-n_1^{m*}} - \frac{\Delta U}{\nu}\right)\right) = 1, \quad (55)$$

and  $n_1^{m*}$  is the unique solution of the above equation. When  $n_1^{m*} = n_1^*$ , the left hand side of (55) is:

$$\begin{aligned} & n_1^* \exp\left(\frac{n_1^*}{1-n_1^*} - \frac{\Delta U + A_j - U_j^* - u_e^0 - \nu}{\nu}\right) + n_1^* + (M-2)H\left(n_1^* \exp\left(\frac{n_1^*}{1-n_1^*} - \frac{\Delta U}{\nu}\right)\right) \\ & \leq n_1^* \exp\left(\frac{n_1^*}{1-n_1^*} - \frac{A_j - U_j^* - u_e^0 - \nu}{\nu}\right) + n_1^* + (M-2)H\left(n_1^* \exp\left(\frac{n_1^*}{1-n_1^*}\right)\right) \\ & = n_1^* \left( M-1 + \exp\left(\frac{n_1^*}{1-n_1^*} - \frac{A_j - U_j^* - u_e^0 - \nu}{\nu}\right) \right) < n_1^* \left( M + \exp\left(\frac{n_1^*}{1-n_1^*} - \frac{A_1 - U_1^* - u_e^0 - \nu}{\nu}\right) \right) = 1. \end{aligned}$$

Therefore,  $n_1^{m*} > n_1^*$  always holds. By (17),  $\pi_1^{m*} > \pi_1^*$  always holds as well.

Since the left hand side of (55) strictly increases in  $n_1^{m*}$ ,  $n_1^{m*} \geq n_1^* + n_2^* = 2n_j^*$  iff

$$2n_j^* \exp\left(\frac{2n_j^*}{1-2n_j^*} - \frac{\Delta U + A_j - U_j^* - u_e^0 - \nu}{\nu}\right) + 2n_j^* + (M-2)H\left(2n_j^* \exp\left(\frac{2n_j^*}{1-2n_j^*} - \frac{\Delta U}{\nu}\right)\right) \leq 1. \quad (56)$$

where  $n_j^*$  is given by (48). Note that the left hand side of (56) is a decreasing function of  $\Delta U$ . Therefore, (56) is equivalent to  $\Delta U \geq \Delta \tilde{U}$ , where  $\Delta \tilde{U}$  is the unique solution of

$$2n_j^* \exp\left(\frac{2n_j^*}{1-2n_j^*} - \frac{\Delta U + A_j - U_j^* - u_e^0 - \nu}{\nu}\right) + 2n_j^* + (M-2)H\left(2n_j^* \exp\left(\frac{2n_j^*}{1-2n_j^*} - \frac{\Delta U}{\nu}\right)\right) = 1. \quad (57)$$

Note that when  $\Delta U = \Delta \bar{U}$ , the left hand side of (57) is given by

$$2n_j^* \exp\left(\frac{n_j^*}{1-n_j^*} - \ln 2 - \frac{A_j - U_j^* - u_e^0 - \nu}{\nu}\right) + 2n_j^* + (M-2)H\left(2n_j^* \exp\left(\frac{n_j^*}{1-n_j^*} - \ln 2\right)\right)$$

$$= n_j^* \left( M + \exp \left( \frac{n_j^*}{1 - n_j^*} - \frac{A_j - U_j^* - u_e^0 - \nu}{\nu} \right) \right) = 1.$$

Since the left hand side of (57) is a decreasing function of  $\Delta U$ , the above equality proves that  $\Delta \tilde{U} = \Delta \bar{U}$ .

By (17),  $\pi_1^{m*} \geq \pi_1^* + \pi_2^* = 2\pi_1^*$  is equivalent to  $n_1^{m*} \geq \frac{2n_1^*}{1+n_1^*}$ . Therefore,  $\pi_1^{m*} \geq \pi_1^* + \pi_2^*$  iff

$$\frac{2n_j^*}{1+n_j^*} \exp \left( \frac{2n_j^*}{1-n_j^*} - \frac{\Delta U + A_j - U_j^* - u_e^0 - \nu}{\nu} \right) + \frac{2n_j^*}{1+n_j^*} + (M-2)H \left( \frac{2n_j^*}{1+n_j^*} \exp \left( \frac{2n_j^*}{1-n_j^*} - \frac{\Delta U}{\nu} \right) \right) \leq 1. \quad (58)$$

where  $n_j^*$  is given by (48). Note that the left hand side of (58) is a decreasing function of  $\Delta U$ . Therefore, (58) is equivalent to  $\Delta U \geq \Delta \underline{U}$ , where  $\Delta \underline{U}$  is the unique solution of

$$\frac{2n_j^*}{1+n_j^*} \exp \left( \frac{2n_j^*}{1-n_j^*} - \frac{\Delta U + A_j - U_j^* - u_e^0 - \nu}{\nu} \right) + \frac{2n_j^*}{1+n_j^*} + (M-2)H \left( \frac{2n_j^*}{1+n_j^*} \exp \left( \frac{2n_j^*}{1-n_j^*} - \frac{\Delta U}{\nu} \right) \right) = 1. \quad (59)$$

It follows from (55) that  $n_1^{m*}$  increases in  $\Delta U$ . Since  $\frac{2n_1^*}{1+n_1^*} < 2n_1^*$ , we have  $\Delta \underline{U} < \Delta \tilde{U} = \Delta \bar{U}$ .

By (19),  $\bar{v}^{m*} \geq \bar{v}^*$  iff  $n_0^{m*} \leq n_0^*$ . Using (51),  $n_0^{m*} \leq n_0^*$  is equivalent to

$$n_j^{m*} \exp \left( \frac{n_j^{m*}}{1 - n_j^{m*}} - \frac{A_j - U_j^{m*} - u_e^0 - \nu}{\nu} \right) \leq n_j^* \exp \left( \frac{n_j^*}{1 - n_j^*} - \frac{A_j - U_j^* - u_e^0 - \nu}{\nu} \right), \quad j = 3, \dots, M. \quad (60)$$

It directly follows that the above inequality is equivalent of  $n_j^{m*} \leq n_j^*$  ( $j = 3, \dots, M$ ). Therefore,  $\bar{v}^{m*} \geq \bar{v}^*$  iff  $\Delta U \geq \Delta \bar{U}$ . By (21) and (22), we have  $n_I^{m*} \geq n_I^*$  iff  $\Delta U \geq \Delta \bar{U}$ .

For the industry profit after the merger, we will show that  $\pi_I^{m*}$  increases in  $\Delta U$ . By (16), we have  $n_1^{m*} = H \left( n_j^{m*} \exp \left( \frac{n_j^{m*}}{1 - n_j^{m*}} + \frac{\Delta U}{\nu} \right) \right)$  for  $j = 3, \dots, M$ . Take derivative with respect to  $\Delta U$ , and use (35), we have

$$\frac{\partial n_1^{m*}}{\partial \Delta U} = \frac{(1 - n_1^{m*})^2}{(1 - n_1^{m*} + n_1^{m*2}) \exp \left( \frac{n_1^{m*}}{1 - n_1^{m*}} \right)} \exp \left( \frac{n_j^{m*}}{1 - n_j^{m*}} + \frac{\Delta U}{\nu} \right) \left( \frac{n_j^{m*}}{\nu} + \frac{1 - n_j^{m*} + n_j^{m*2}}{(1 - n_j^{m*})^2} \frac{\partial n_j^{m*}}{\partial \Delta U} \right). \quad (61)$$

Apply Implicit Function Theorem to (52), we have for  $j = 3, \dots, M$

$$\frac{\partial n_j^{m*}}{\partial \Delta U} = \frac{-\frac{(1 - n_1^{m*})^2 n_j^{m*} \exp \left( \frac{n_j^{m*}}{1 - n_j^{m*}} - \frac{n_1^{m*}}{1 - n_1^{m*}} + \frac{\Delta U}{\nu} \right)}{\nu (1 - n_1^{m*} + n_1^{m*2})}}{M - 2 + \frac{1 - n_j^{m*} + n_j^{m*2}}{(1 - n_j^{m*})^2} \left( \exp \left( \frac{n_j^{m*}}{1 - n_j^{m*}} - \frac{A_j - U_j^* - u_e^0 - \nu}{\nu} \right) + \frac{(1 - n_1^{m*})^2}{1 - n_1^{m*} + n_1^{m*2}} \exp \left( \frac{n_j^{m*}}{1 - n_j^{m*}} - \frac{n_1^{m*}}{1 - n_1^{m*}} + \frac{\Delta U}{\nu} \right) \right)} \quad (62)$$

Substitute (17), (61) and (62) into (22), we have:  $\partial \pi_I^{m*} / \partial \Delta U =$

$$\frac{n_j^{m*} \exp \left( \frac{n_j^{m*}}{1 - n_j^{m*}} - \frac{n_1^{m*}}{1 - n_1^{m*}} + \frac{\Delta U}{\nu} \right) \left( (M-2) \left( 1 - \frac{(1 - n_1^{m*})^2}{(1 - n_j^{m*})^2} \right) + \frac{1 - n_j^{m*} + n_j^{m*2}}{(1 - n_j^{m*})^2} \exp \left( \frac{n_j^{m*}}{1 - n_j^{m*}} - \frac{A_j - U_j^* - u_e^0 - \nu}{\nu} \right) \right)}{(1 - n_1^{m*} + n_1^{m*2}) \left( M - 2 + \frac{1 - n_j^{m*} + n_j^{m*2}}{(1 - n_j^{m*})^2} \left( \frac{(1 - n_1^{m*})^2}{1 - n_1^{m*} + n_1^{m*2}} \exp \left( \frac{n_j^{m*}}{1 - n_j^{m*}} - \frac{n_1^{m*}}{1 - n_1^{m*}} + \frac{\Delta U}{\nu} \right) + \exp \left( \frac{n_j^{m*}}{1 - n_j^{m*}} - \frac{A_j - U_j^* - u_e^0 - \nu}{\nu} \right) \right) \right)} > 0.$$

At  $\Delta U = 0$ ,  $\pi_I^*$  is the unique solution of  $\frac{\pi_I^*}{M\nu + \pi_I^*} \left( M + \exp \left( \frac{\pi_I^*}{M\nu} - \frac{A_j - U_j^* - u_e^0 - \nu}{\nu} \right) \right) = 1$ , and  $\pi_I^{m*}$  is the unique solution of  $\frac{\pi_I^{m*}}{(M-1)\nu + \pi_I^{m*}} \left( M - 1 + \exp \left( \frac{\pi_I^{m*}}{(M-1)\nu} - \frac{A_j - U_j^* - u_e^0 - \nu}{\nu} \right) \right) = 1$ . If  $\pi_I^{m*} \geq \pi_I^*$  at  $\Delta U = 0$ , then  $\pi_I^{m*} \geq \pi_I^*$  for any  $\Delta U \geq 0$ , and we set  $\Delta \underline{U} = 0$ . Otherwise, if  $\pi_I^{m*} \leq \pi_I^*$  at  $\Delta U = 0$ , there exists a threshold  $\Delta \underline{U} \geq 0$ , such that  $\pi_I^{m*} \leq \pi_I^*$  if  $\Delta U \leq \Delta \underline{U}$ , and  $\pi_I^{m*} \geq \pi_I^*$  if  $\Delta U \geq \Delta \underline{U}$ . Since  $\pi_I^{m*} \geq \pi_I^*$  if  $\Delta U \in [\Delta \underline{U}, \Delta \bar{U}]$ , we have  $\Delta \underline{U} \leq \Delta \underline{U}$ .

*Proof of Proposition 6* As shown in the proof of Proposition 5,  $\partial\pi_I^{m^*}/\partial\Delta U > 0$ . By (19), we have  $\partial\bar{v}^{m^*}/\partial\Delta U = -(\nu/n_0^{m^*})(\partial n_0^{m^*}/\Delta U)$ . By (15),  $n_0^{m^*}$  satisfies the equation  $n_0^{m^*} + H\left(n_0^{m^*} \exp\left(\frac{A_1 - U_1^* + \Delta U - u_e^0 - \nu}{\nu}\right)\right) + (M-2)H\left(n_0^{m^*} \exp\left(\frac{A_j - U_j^* - u_e^0 - \nu}{\nu}\right)\right) = 1$ , and thus  $\partial n_0^{m^*}/\Delta U < 0$ . Therefore,  $\Pi^{m^*}$  increases in  $\Delta U$ . Combine with part (I) and (IV) of Proposition 5, there exists a threshold values of the power index,  $\Delta\hat{U}$  which lies between  $\Delta\underline{U}$  and  $\Delta\bar{U}$ , such that  $\Pi^{m^*} \leq \Pi^*$  if  $0 \leq \Delta U \leq \Delta\hat{U}$ , and  $\Pi^{m^*} \geq \Pi^*$  if  $\Delta U \geq \Delta\hat{U}$ .

*Proof of Proposition 7* By (18), we have  $V_j^* = A_j - u_e^0 - \nu \ln\left(\frac{n_j^*}{n_0^*}\right)$  for  $j = 1, \dots, M$ ,  $V_1^{m^*} = A_1 - u_e^0 - \nu \ln\left(\frac{n_1^{m^*}}{n_0^{m^*}}\right)$  and  $V_j^{m^*} = A_j - u_e^0 - \nu \ln\left(\frac{n_j^{m^*}}{n_0^{m^*}}\right)$  for  $j = 3, \dots, M$ . Use (16), we have  $V_j^{m^*} \geq V_j^*$  ( $j = 3, \dots, M$ ) iff  $n_j^* \leq n_j^{m^*}$  ( $j = 3, \dots, M$ ). By the result of Proposition 5, it follows that  $V_j^{m^*} \geq V_j^*$  iff  $\Delta U \leq \Delta\bar{U}$  for  $j = 3, \dots, M$ .

Similarly,  $V_1^{m^*} \geq V_1^* \Leftrightarrow n_1^{m^*} \geq \frac{\nu n_j^* + (1 - n_j^*)\Delta U}{\nu + (1 - n_j^*)\Delta U}$ , which is equivalent to the following condition using (55):

$$\frac{\nu n_j^* + (1 - n_j^*)\Delta U}{\nu + (1 - n_j^*)\Delta U} \left( \exp\left(\frac{n_j^*}{1 - n_j^*} - \frac{A_j - U_j^* - u_e^0 - \nu}{\nu}\right) + 1 \right) + (M-2)H\left(\frac{\nu n_j^* + (1 - n_j^*)\Delta U}{\nu + (1 - n_j^*)\Delta U} \exp\left(\frac{n_j^*}{1 - n_j^*}\right)\right) \leq 1. \quad (63)$$

Note that the left-hand-side of (63) increases in  $\Delta U$ . Therefore,  $V_1^{m^*} \geq V_1^* \Leftrightarrow \Delta U \leq \Delta\hat{U}$ , where  $\Delta\hat{U}$  is the unique solution of

$$\frac{\nu n_j^* + (1 - n_j^*)\Delta U}{\nu + (1 - n_j^*)\Delta U} \left( \exp\left(\frac{n_j^*}{1 - n_j^*} - \frac{A_j - U_j^* - u_e^0 - \nu}{\nu}\right) + 1 \right) + (M-2)H\left(\frac{\nu n_j^* + (1 - n_j^*)\Delta U}{\nu + (1 - n_j^*)\Delta U} \exp\left(\frac{n_j^*}{1 - n_j^*}\right)\right) = 1. \quad (64)$$

Note that at  $\Delta U = \Delta\bar{U}$  given by (54), and use (48), the left-hand-side of (63) is

$$\begin{aligned} & \frac{2n_j^* + (1 - 2n_j^*) \ln 2}{1 + (1 - 2n_j^*) \ln 2} \left( \frac{1}{n_j^*} - M + 1 \right) + (M-2)H\left(\frac{2n_j^* + (1 - 2n_j^*) \ln 2}{1 + (1 - 2n_j^*) \ln 2} \exp\left(\frac{n_j^*}{1 - n_j^*}\right)\right) \\ & > 2n_j^* \left( \frac{1}{n_j^*} - M + 1 \right) + (M-2)H\left(n_j^* \exp\left(\frac{n_j^*}{1 - n_j^*}\right)\right) = 2 - Mn_j^* > 1. \end{aligned}$$

Therefore, we have  $\Delta\hat{U} < \Delta\bar{U}$ .

For the share-weighted industry average aggregate price decision, it directly follows that  $V_I^{m^*} \geq V_I^*$  if  $\Delta U \leq \Delta\hat{U}$ , and  $V_I^{m^*} \leq V_I^*$  if  $\Delta U \geq \Delta\bar{U}$ . When  $\Delta\hat{U} \leq \Delta U \leq \Delta\bar{U}$ ,  $V_1^{m^*} \leq V_1^*$  while  $V_j^{m^*} \geq V_j^*$  ( $j = 3, \dots, M$ ). By (18) and (24), we have  $V_I^{m^*} \geq V_I^*$  iff

$$n_1^{m^*} \ln\left(\frac{n_1^{m^*} n_0^*}{n_0^{m^*} n_1^*}\right) - (M-2)n_j^{m^*} \ln\left(\frac{n_0^{m^*} n_j^*}{n_j^{m^*} n_0^*}\right) \leq 0, \quad j = 3, \dots, M. \quad (65)$$

It follows from (55), (52) and (15) that  $n_1^{m^*}$  increases in  $\Delta U$ ,  $n_j^{m^*}$  decreases in  $\Delta U$  ( $j = 3, \dots, M$ ) and  $n_0^{m^*}$  decreases in  $\Delta U$ . By (16), we have  $\frac{n_j^{m^*}}{n_0^{m^*}} = \exp\left(\frac{n_j^*}{1 - n_j^*} - \frac{A_j - U_j^* - u_e^0 - \nu}{\nu}\right)$ , which decreases in  $\Delta U$ . Therefore, the left-hand-side of (65) increases in  $\Delta U$ . Since the left-hand-side of (65) is less than 0 at  $\Delta U = \Delta\hat{U}$ , and greater than 0 at  $\Delta U = \Delta\bar{U}$ . There exists a threshold value  $\Delta\check{U} \in [\Delta\hat{U}, \Delta\bar{U}]$ , such that  $V_I^{m^*} \geq V_I^*$  if  $\Delta U \leq \Delta\check{U}$ , and  $V_I^{m^*} \leq V_I^*$  if  $\Delta U \geq \Delta\check{U}$ .

## Appendix B: Extension

We now extend our base model to the more general setting of multiple client organizations, each with drugs from multiple therapeutical classes. First, we consider the setting of one client organization with drugs from multiple therapeutical classes. When there are  $L$  therapeutical classes, PBM  $j$  needs to charge the same copayment for all drugs on the same formulary tier and pass the same percentage of rebate to the client organization for all branded drugs that are on the preferred tier. Therefore, the copayment values ( $c_j^g$ ,  $c_j^p$ , and  $c_j^n$ ) and rebate pass-through rates ( $\rho_j$ ) do not vary across different therapeutical classes. All other model primitives and decision variables depend on each drug's therapeutical class, so we add subscript  $k$  ( $k = 1, \dots, L$ ) to each of them to denote the drug's therapeutical class. It can be verified that Theorem 1 continues to hold with

$$U_j(\vec{y}_{j1}, \dots, \vec{y}_{jL}) = \sum_{k=1}^L U_{jk}(\vec{y}_{jk}) = \sum_{k=1}^L (W_{jk}(\vec{y}_{jk}) - CS_{jk}(\vec{y}_{jk})) \quad (66)$$

$$\text{and } V_j(\vec{y}_{j1}, \dots, \vec{y}_{jL}, \vec{p}_{j1}, \dots, \vec{p}_{jL}) = \sum_{k=1}^L V_{jk}(\vec{y}_{jk}, \vec{p}_{jk}) = \sum_{k=1}^L (B_{jk}(\vec{y}_{jk}, \vec{p}_{jk}) - CS_{jk}(\vec{y}_{jk})). \quad (67)$$

It follows from Theorem 1 that each PBM obtains its optimal formulary decision vector by minimizing the welfare-adjusted cost of its plan in (66). Note from (66) that the formulary decisions for different therapeutical classes are separable, because drugs in different therapeutical classes are not substitutable. Therefore, each PBM can solve for its optimal formulary decision vector of each therapeutical class separately. With the optimal formulary decision of each PBM determined, the PBMs compete in the reduced price competition by choosing the welfare-adjusted price of its plan, as defined in (67). The equilibrium welfare-adjusted price, the equilibrium expected market share and the expected profit of each PBM, as well as the client organization's expected utility, can be obtained by Theorem 2. It can be verified that all comparative statics results, as well as the result on the impact of PBM mergers, continue to hold in the case with multiple therapeutical classes.

Next, we consider the case with multiple client organizations. It is common in the PBM industry for a PBM to offer a customized plan for each of its client organizations. Since a PBM does not have to commit to the same formulary and pricing schemes for different clients, its formulary and price decisions are completely separable across different clients. Therefore, a PBM can obtain its formulary and price decisions for a client organization, without considering other client organizations, by the procedure outlined above. This result is consistent with the current practice in the PBM industry that different client organizations typically reach out to PBMs requesting a complete design of a coverage plan at different times of a calendar year, and PBMs respond to such requests by customizing a plan for each client organization.

### Appendix C: Discussion on the Utility Function of the Client Organization

In the paper, we use the additive random utility function to model the client organization's utility as given in equation (4). As a result, PBM  $j$ 's market share function (i.e., the probability that the client organization selects PBM  $j$ ),  $n_j$ , is given by the MNL model as in equation (5). Using the definition of the welfare-adjusted price  $V_j$  in (7), the market share function for PBM  $j$ ,  $n_j$ , is a function of the welfare-adjusted prices of all PBMs, as follows,

$$n_j(V_j, V_{-j}) = \frac{\exp((A_j - V_j)/\nu)}{\exp(u_e^0/\nu) + \sum_{k=1}^M \exp((A_k - V_k)/\nu)}, \quad j = 1, \dots, M.$$

The above MNL model results from the client's additive random utility function (4) and the assumption on the distribution of the random terms in (4).

Alternatively, beyond the basic factors of consumer surplus and plan cost, if other factors (which has been labeled as the term  $A_j$  in our model) affect the client's utility function (and hence the client's choice of PBM) in different ways from what we have modeled in this paper, PBM  $j$ 's market share function  $n_j(V_j, V_{-j})$  will be different from the MNL model. For a general function form of  $n_j(V_j, V_{-j})$ , we can show that, if the PBM  $j$ 's market share function,  $n_j(V_j, V_{-j})$ , is decreasing and (weakly) log-concave in the welfare-adjusted price of PBM  $j$ 's plan,  $V_j$ , then the equilibrium of the PBMs' competition on the aggregate formulary and price decisions still exists. The assumption that  $n_j(V_j, V_{-j})$  is a decreasing function of  $V_j$  reflects the client's preference on the cost-effective quality care provided by a PBM. The assumption that  $n_j(V_j, V_{-j})$  is (weakly) log-concave in  $V_j$  is common in the literature, which is satisfied by many different forms of demand functions, including linear demand function, logit demand function, and exponential demand function. In addition, every nonnegative concave function is also log-concave. Moreover, if  $n_j(V_j, V_{-j})$  satisfies the condition that  $\frac{\partial^2 \ln n_j}{\partial V_j^2} + \sum_{k=1, k \neq j}^M \left| \frac{\partial^2 \ln n_j}{\partial V_j \partial V_k} \right| \leq 0$ , the equilibrium of the PBMs' competition on the aggregate formulary and price decisions is unique. For the general function form of  $n_j(V_j, V_{-j})$ , the equilibrium results depend on the specific form of  $n_j(V_j, V_{-j})$ , and may not be explicitly characterized in closed forms.
